# Supplementary material
Source: PubMed Central journal article supplement (PMC6553935)

Supplemental Figure 1. Subnetwork No.2-9. Edge color indicates the type of the correlation between two proteins : Red, positive correlation; Blue, negative correlation.

Subnetwork No.2

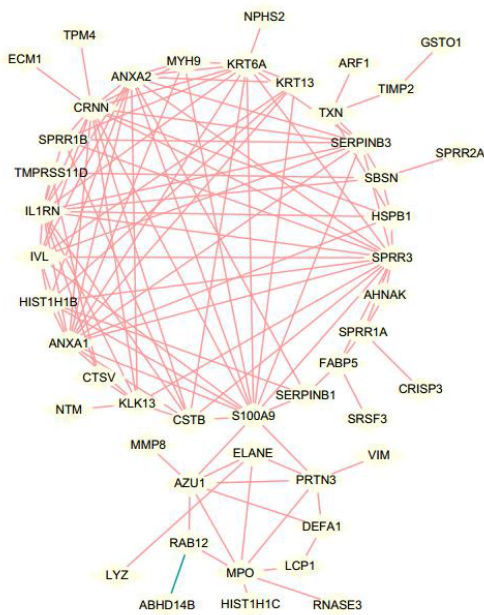

Subnetwork No.3

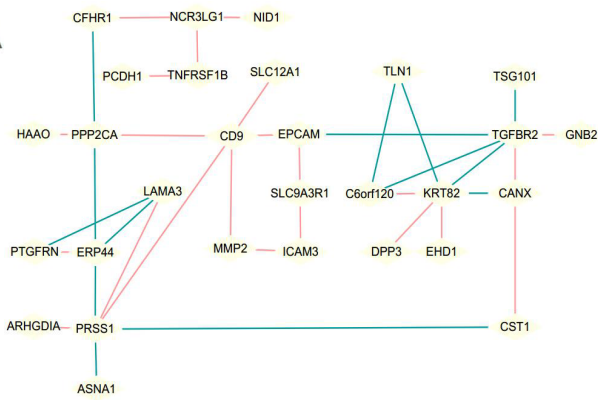

Subnetwork No.4

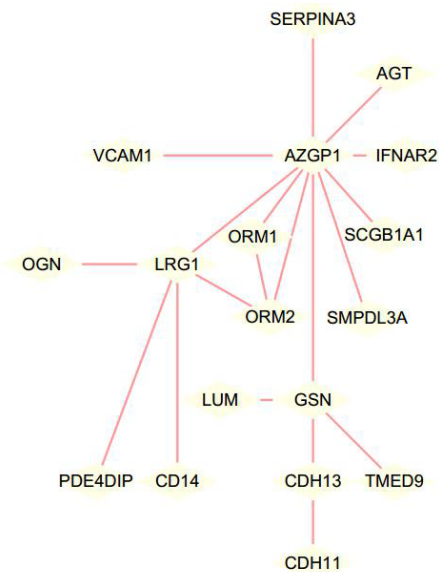

Subnetwork No.5

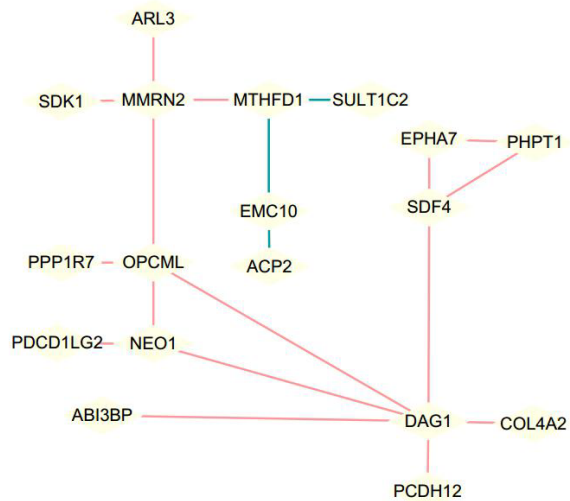

Subnetwork No.6

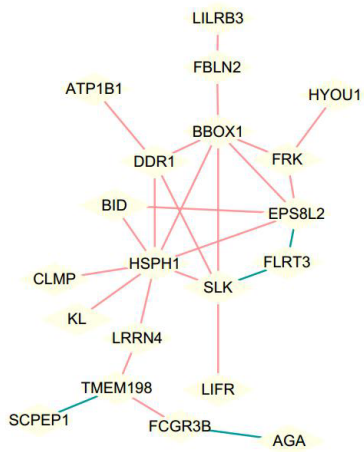

Subnetwork No.7

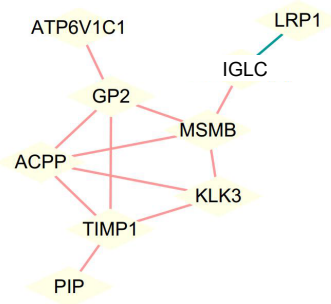

Subnetwork No.8

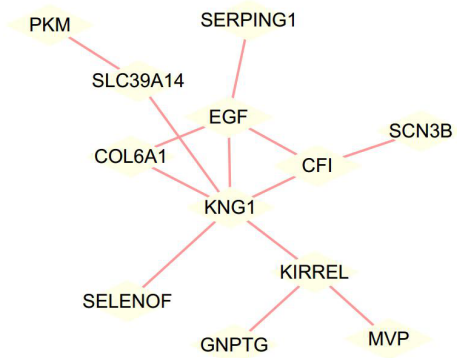

Subnetwork No.9

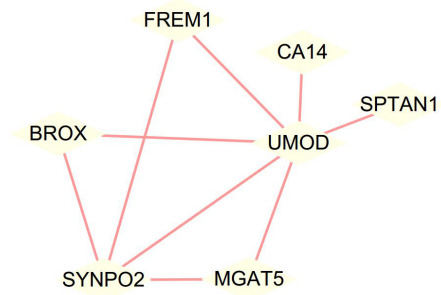

Supplemental Figure 2. Impacts of proteins increased in the female (left) and male (right) urines on cell invasion.

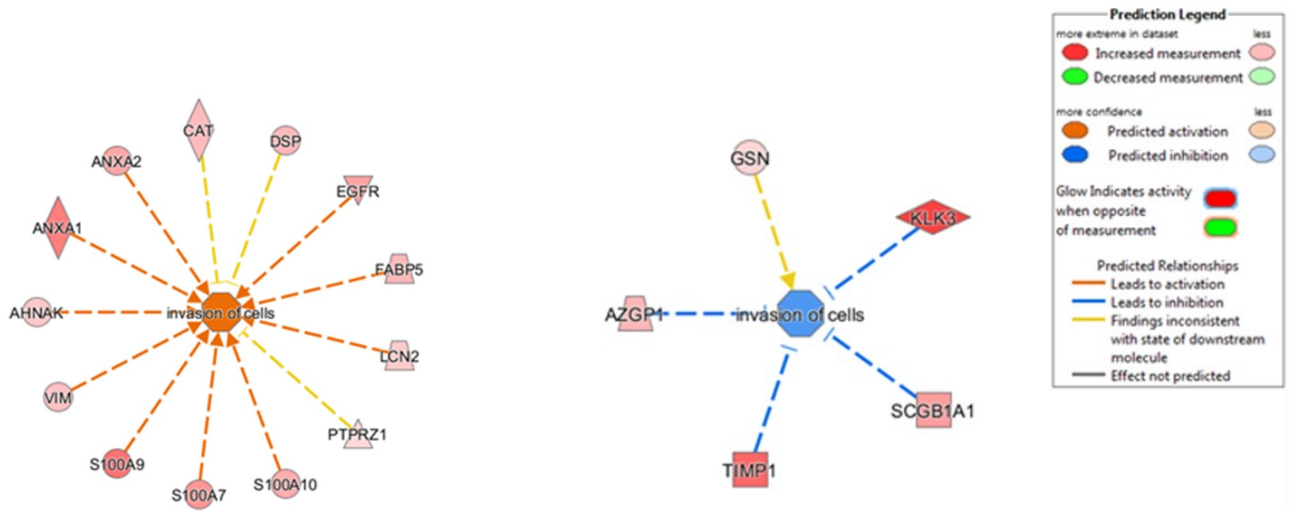

Supplement: 143228_1_supp_300937_p776s7.pdf [file 143228_1_supp_300937_p776s7.pdf]
